# Supplementary material
Source: publisher figshare collection journal article supplement (https://geolsoc.figshare.com/ndownloader/files/34060814)

## Positive topography

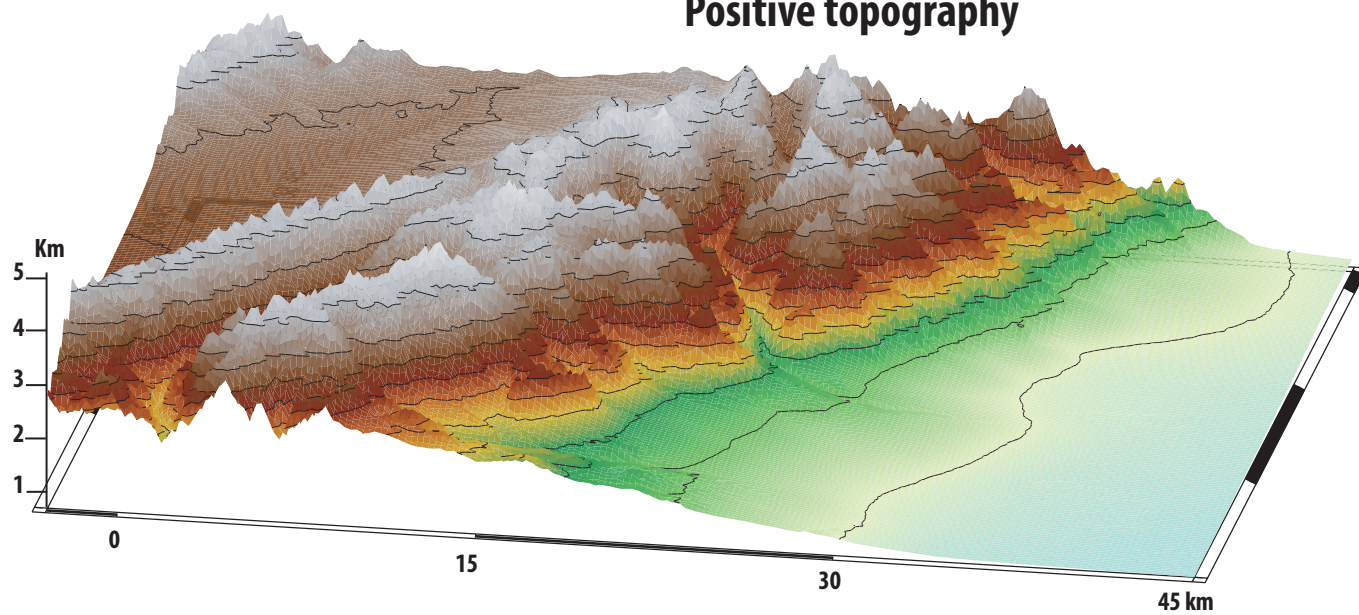

## Relict-landscape topography

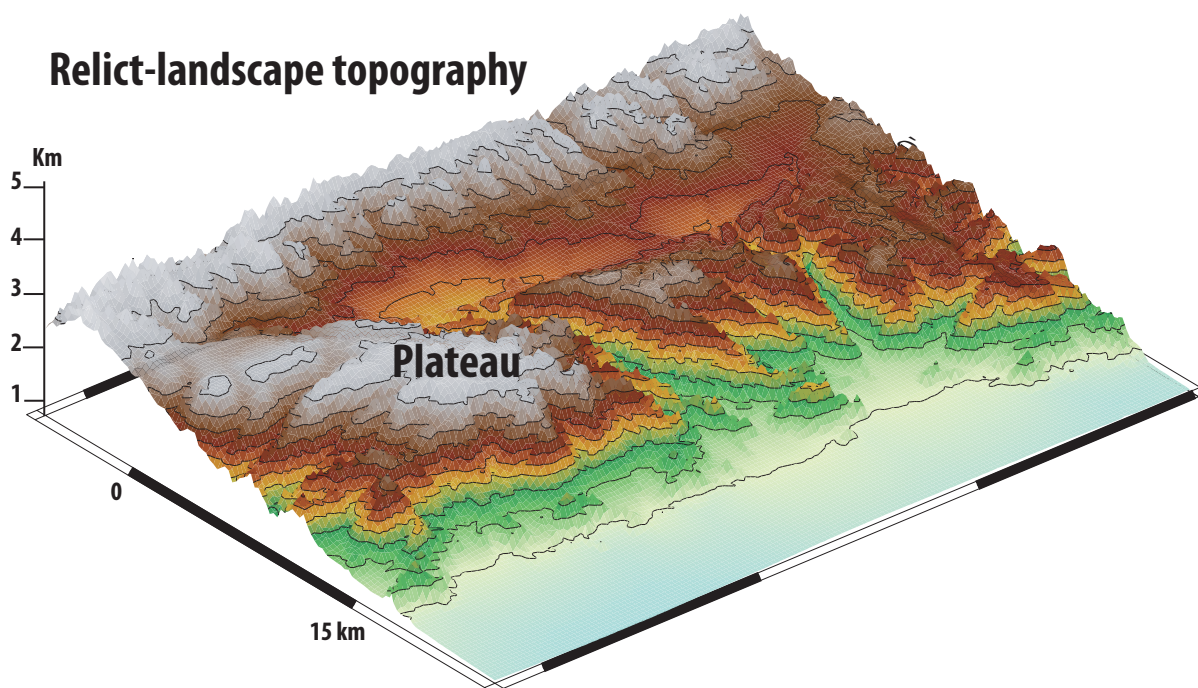

Supplement: Supplementary file 1 [file 34060814]
